# Supplementary material for: Incursion of European Bat Lyssavirus 1 (EBLV-1) in Serotine Bats in the United Kingdom
Source: MDPI journal article supplement (doi:10.3390/v13101979), 2021-10-01
Supplement: s1 [file s1]

## Supplementary files

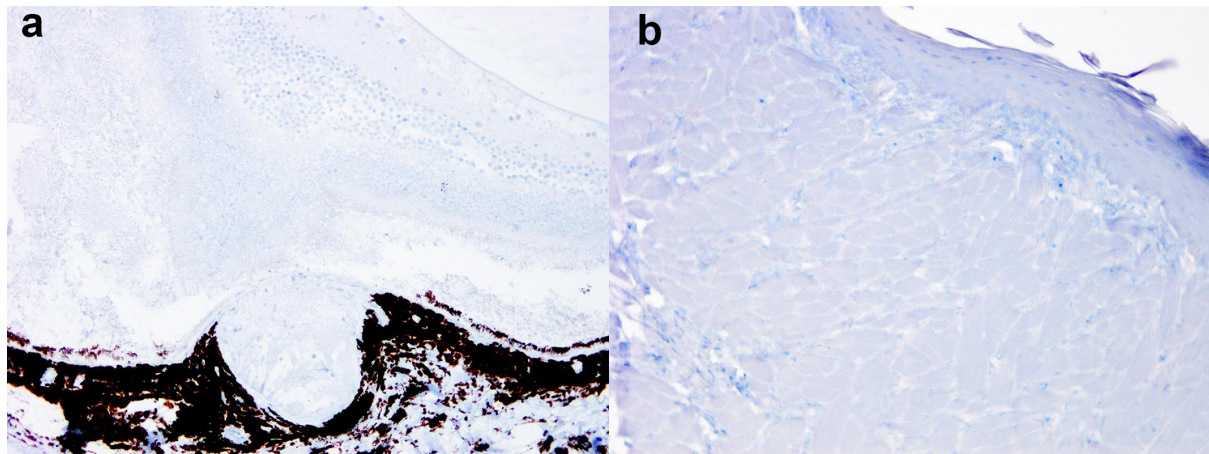

**Figure S1. Immunohistochemistry control tissues of lyssavirus RT-PCR negative serotine bats (*Eptesicus serotinus*).** (a) Serial sectioned of eye as per Figure 2.a with mouse IgG control. (b) Section of tongue from a lyssavirus negative serotine bat stained with 512B lyssavirus IHC. No non-specific labelling was detected in either control stained sections. Images taken at 200x.

**Table S1. Sanger derived sequences for the seven EBLV-1 infected serotine bats (*E. serotinus*) detected in the UK between 2018 and 2021. Sequence for 762-18 deposited on Genbank accession number: MZ821029.**

| APHA bat ID | Location | Sequence                                                                                                                                                                                                                                                                                                                                                                                                                         |
|-------------|----------|----------------------------------------------------------------------------------------------------------------------------------------------------------------------------------------------------------------------------------------------------------------------------------------------------------------------------------------------------------------------------------------------------------------------------------|
| 762-18      | Dorset   | ATGGATGTTAACAAGGTTGTTTTAAGGTCATAATCAGTTGGTCTCGGTGAAACCTGAGGTGATTTCTGATCAGTATGAGTACAAATACCCCTGCCATTA<br>AAGACAAGAAGAAACCGAGCATCACTCTCGGAAAAGATCCTGATTTGAAAACCGCCTACAAGTCTATCTTGTGAGGGATGAATGCTGCTAAATGGACCC<br>AGATGACGCTCTGCTCCTATTAGCTGGAGCCATGGTCTTGTGAGGGCATATGCCAGAAAGATTGGACTAGTTACGGAATCAACATTGCAAGAAAGGT<br>GACAAGATCACACCTGCTACGTTAGTGGACATCAATCGGACGAACACTGAGGGCAACTGGGCTCAACAGGAGGTCAAGATCTCACTCGGGACCCCTACGA<br>CACCT |
| 791-18      | Dorset   | ATGGATGTTAACAAGGTTGTTTTAAGGTCATAATCAGTTGGTCTCGGTGAAACCTGAGGTGATTTCTGATCAGTATGAGTACAAATACCCCTGCCATTA<br>AAGACAAGAAGAAACCGAGCATCACTCTCGGAAAAGATCCTGATTTGAAAACCGCCTACAAGTCTATCTTGTGAGGGATGAATGCTGCTAAATGGACCC<br>AGATGACGCTCTGCTCCTATTAGCTGGAGCCATGGTCTTGTGAGGGCATATGCCAGAAAGATTGGACTAGTTACGGAATCAACATTGCAAGAAAGGT<br>GACAAGATCACACCTGCTACGTTAGTGGACATCAATCGGACGAACACTGAGGGCAACTGGGCTCAACAGGAGGTCAAGATCTCACTCGGGACCCCTACGA<br>CACCT |
| 177-19      | Dorset   | ATGGATGTTAACAAGGTTGTTTTAAGGTCATAATCAGTTGGTCTCGGTGAAACCTGAGGTGATTTCTGATCAGTATGAGTACAAATACCCCTGCCATTA<br>AAGACAAGAAGAAACCGAGCATCACTCTCGGAAAAGATCCTGATTTGAAAACCGCCTACAAGTCTATCTTGTGAGGGATGAATGCTGCTAAATGGACCC<br>AGATGACGCTCTGCTCCTATTAGCTGGAGCCATGGTCTTGTGAGGGCATATGCCAGAAAGATTGGACTAGTTACGGAATCAACATTGCAAGAAAGGT<br>GACAAGATCACACCTGCTACGTTAGTGGACATCAATCGGACGAACACTGAGGGCAACTGGGCTCAACAGGAGGTCAAGATCTCACTCGGGACCCCTACGA<br>CACCT |
| 854-19      | Dorset   | ATGGATGTTAACAAGGTTGTTTTAAGGTCATAATCAGTTGGTCTCGGTGAAACCTGAGGTGATTTCTGATCAGTATGAGTACAAATACCCCTGCCATTA<br>AAGACAAGAAGAAACCGAGCATCACTCTCGGAAAAGATCCTGATTTGAAAACCGCCTACAAGTCTATCTTGTGAGGGATGAATGCTGCTAAATGGACCC<br>AGATGACGCTCTGCTCCTATTAGCTGGAGCCATGGTCTTGTGAGGGCATATGCCAGAAAGATTGGACTAGTTACGGAATCAACATTGCAAGAAAGGT<br>GACAAGATCACACCTGCTACGTTAGTGGACATCAATCGGACGAACACTGAGGGCAACTGGGCTCAACAGGAGGTCAAGATCTCACTCGGGACCCCTACGA<br>CACCT |
| 949-19      | Dorset   | ATGGATGTTAACAAGGTTGTTTTAAGGTCATAATCAGTTGGTCTCGGTGAAACCTGAGGTGATTTCTGATCAGTATGAGTACAAATACCCCTGCCATTA<br>AAGACAAGAAGAAACCGAGCATCACTCTCGGAAAAGATCCTGATTTGAAAACCGCCTACAAGTCTATCTTGTGAGGGATGAATGCTGCTAAATGGACCC<br>AGATGACGCTCTGCTCCTATTAGCTGGAGCCATGGTCTTGTGAGGGCATATGCCAGAAAGATTGGACTAGTTACGGAATCAACATTGCAAGAAAGGT<br>GACAAGATCACACCTGCTACGTTAGTGGACATCAATCGGACGAACACTGAGGGCAACTGGGCTCAACAGGAGGTCAAGATCTCACTCGGGACCCCTACGA<br>CACCT |
| 621-20      | Dorset   | ATGGATGTTAACAAGGTTGTTTTAAGGTCATAATCAGTTGGTCTCGGTGAAACCTGAGGTGATTTCTGATCAGTATGAGTACAAATACCCCTGCCATTA<br>AAGACAAGAAGAAACCGAGCATCACTCTCGGAAAAGATCCTGATTTGAAAACCGCCTACAAGTCTATCTTGTGAGGGATGAATGCTGCTAAATGGACCC<br>AGATGACGCTCTGCTCCTATTAGCTGGAGCCATGGTCTTGTGAGGGCATATGCCAGAAAGATTGGACTAGTTACGGAATCAACATTGCAAGAAAGGT<br>GACAAGATCACACCTGCTACGTTAGTGGACATCAATCGGACGAACACTGAGGGCAACTGGGCTCAACAGGAGGTCAAGATCTCACTCGGGACCCCTACGA<br>CACCT |
| 807-20      | Somerset | ATGGATGTTAACAAGGTTGTTTTAAGGTCATAATCAGTTGGTCTCGGTGAAACCTGAGGTGATTTCTGATCAGTATGAGTACAAATACCCCTGCCATTA<br>AAGACAAGAAGAAACCGAGCATCACTCTCGGAAAAGATCCTGATTTGAAAACCGCCTACAAGTCTATCTTGTGAGGGATGAATGCTGCTAAATGGACCC<br>AGATGACGCTCTGCTCCTATTAGCTGGAGCCATGGTCTTGTGAGGGCATATGCCAGAAAGATTGGACTAGTTACGGAATCAACATTGCAAGAAAGGT<br>GACAAGATCACACCTGCTACGTTAGTGGACATCAATCGGACGAACACTGAGGGCAACTGGGCTCAACAGGAGGTCAAGATCTCACTCGGGACCCCTACGA<br>CACCT |
